# Supplementary material for: High-sulfated derivative of polysaccharide fromUlva pertusaimproves Adriamycin-induced nephrotic syndrome by suppressing oxidative stress
Source: Royal Society of Chemistry journal article supplement (doi:10.1039/d3fo01290e), 2023-01-01
Supplement: d3fo01290e1.xlsx [file d3fo01290e1.xlsx]

## Sheet: ALB
NOR	ADR	ADR+HU	ADR+U
33.4	22.4	24.4	22.2
34.2	22.1	23.5	21.3
34.8	20.3	23.4	22.2
33.6	20.8	31.2	21.4
34.2	22.4	22.5	22.7
33.3	20.3	24.8	22.5

## Sheet: body weight
Week	NOR							ADR						ADR+HU						ADR+U
0	182.3	179.2	179.9	182.1	186.7	183.6	186.4	184.5	188.4	177.6	180	185.9	181.2	185.8	182.7	182.3	181.3	187.5	179.6	179.5	187.6	182.9	189.7	187.2	179.6
2	297.5	286.2	279.2	290.5	304.3	300.5	259.4	267.5	302.2	286.1	297.9	299.7	300.3	303.6	305.7	283	299.8	291.1	283.2	292.2	287.3	295.7	308.8	311.9	278.9
3	352.5	335.7	335.4	348.6	360.6	345.7	254.2	270.7	308.1	268.1	298.7	296.3	304	311.2	284.2	279.4	295.2	305.7	295.2	308.8	290.5	309.6	316.6	332.7	272.1
4	395.5	366.8	376.8	372.6	394.5	371.4	305.5	268.7	316.2	289.7	303.2	301.5	329.8	325.8	319.5	316.3	293.5	315.6	301.9	292.3	312.6	324.3	305.7	341.7	294.8
5	426.3	401.6	420.9	413.5	426.6	411.5	337.2	276.3	318.9	304.8	315.4	322.7	338.1	331.9	332.5	348.9	311.4	333.5	312.2	303.5	310.9	336	313.2	375.5	305.4
6	451.6	415.9	436.2	434.5	447.7	421.2	357.9	270.1	316.7	304.4	312.9	311.5	333.7	333.2	324.6	344.8	303.8	331.5	306.9	305.2	314.5	335	320	375.3	307.6
7	487.2	437.5	462.7	458.8	476.8	441.1	374.5	281.3	322.5	304.3	322.5	331.6	349.4	340.5	337.5	357.7	302.7	334.5	370.7	315.8	323.4	343.2	347.5	394.5	323.6
8	495.4	441.5	464.4	477.5	500.4	458.1	371.2	286.6	334.3	311	325.4	331.7	349.6	351.2	335.8	354.7	280	329.8	317.8	314.5	319.4	357.5	351.9	371.6	334.2
9	526.4	469.2	487.1	500.6	515.2	470.5	399.1	302.9	338.4	312.8	339.7	354.8	364.5	343.1	345.2	369.2	304.1	349.7	324.1	333.4	341.3	368.2	359.7	381.4	350.8
10	534.6	467.5	504.2	497.2	521.2	479.2	405.7	299.8	334.1	301.7	329.6	328.6	346.2	289.7	300.4	327.5	290.6	340.9	304.4	326.4	310.1	353.5	340.2	390.4	342.3

## Sheet: food intake
	NOR						ADR						ADR+HU						ADR+U
1	24.8	24.8	24.8	23.8	23.8	23.8	18.5	18.5	18.5	20.8	20.8	20.8	20.5	20.5	20.5	18.6	18.6	18.6	16.8	16.8	16.8	22.9	22.9	22.9
3	27.6	27.6	27.6	28.2	28.2	28.2	15.8	15.8	15.8	21.5	21.5	21.5	15.6	15.6	15.6	19.3	19.3	19.3	16.3	16.3	16.3	11	11	11
6	25.5	25.5	25.5	24.8	24.8	24.8	18.8	18.8	18.8	21.1	21.1	21.1	16.6	16.6	16.6	17.1	17.1	17.1	15	15	15	25.7	25.7	25.7
8	23.8	23.8	23.8	22.8	22.8	22.8	14.3	14.3	14.3	20.5	20.5	20.5	11.6	11.6	11.6	14.2	14.2	14.2	11	11	11	23.5	23.5	23.5
10	26.2	26.2	26.2	27	27	27	20.2	20.2	20.2	25	25	25	19.8	19.8	19.8	25.1	25.1	25.1	21.9	21.9	21.9	29	29	29
13	27.7	27.7	27.7	23.6	23.6	23.6	15.3	15.3	15.3	21.4	21.4	21.4	16.9	16.9	16.9	19.6	19.6	19.6	20.2	20.2	20.2	26.5	26.5	26.5
17	28.1	28.1	28.1	28	28	28	17.2	17.2	17.2	18.8	18.8	18.8	18.4	18.4	18.4	22.4	22.4	22.4	25.2	25.2	25.2	26.4	26.4	26.4
20	28.4	28.4	28.4	27.3	27.3	27.3	19.6	19.6	19.6	22.1	22.1	22.1	19.2	19.2	19.2	18.8	18.8	18.8	25	25	25	17.8	17.8	17.8
22	22.1	22.1	22.1	22.6	22.6	22.6	16.8	16.8	16.8	20.9	20.9	20.9	16.9	16.9	16.9	18	18	18	15	15	15	7.3	7.3	7.3
24	30.9	30.9	30.9	28.8	28.8	28.8	22	22	22	27.5	27.5	27.5	23.8	23.8	23.8	25.4	25.4	25.4	24	24	24	28.5	28.5	28.5
27	26.2	26.2	26.2	25.9	25.9	25.9	18.6	18.6	18.6	22.3	22.3	22.3	15.8	15.8	15.8	22.6	22.6	22.6	17.5	17.5	17.5	20.2	20.2	20.2
31	28.7	28.7	28.7	26.9	26.9	26.9	19.3	19.3	19.3	27.4	27.4	27.4	18.4	18.4	18.4	21.9	21.9	21.9	21.1	21.1	21	21.5	21.5	21.5
34	26	26	26	24.6	24.6	24.6	18.1	18.1	18.1	22.5	22.5	22.5	17.4	17.4	17.4	19.2	19.2	19.2	17.1	17.1	17.1	10.8	10.8	10.8
36	21.4	21.4	21.4	20.4	20.4	20.4	16.8	16.8	16.8	20.2	20.2	20.2	13.3	13.3	13.3	12.8	12.8	12.8	15.6	15.6	15.6	16.7	16.7	16.7
38	30.2	30.2	30.2	29.9	29.9	29.9	23.4	23.4	23.4	26.7	26.7	26.7	20.2	20.2	20.2	22.6	22.6	22.6	23	23	23	26	26	26
41	23.9	23.9	23.9	24.8	24.8	24.8	17.5	17.5	17.5	20.4	20.4	20.4	15.4	15.4	15.4	12.9	12.9	12.9	15.5	15.5	15.5	15.4	15.4	15.4
45	30.5	30.5	30.5	30.7	30.7	30.7	18.6	18.6	18.6	20.3	20.3	20.3	20.2	20.2	20.2	22.8	22.8	22.8	21.9	21.9	21.9	26.2	26.2	26.2
48	26.5	26.5	26.5	26.3	26.3	26.3	13	13	13	13.8	13.8	13.8	14.7	14.7	14.7	17.7	17.7	17.7	23.2	23.2	23.2	11	11	11

## Sheet: BUN
			NOR	ADR	ADR+HU	ADR+U
			13.69	30.62	14.97	21.27
			13.91	28.18	17.24	32.16
			13.66	33.53	15.53	20.49
			13.49	29.33	18.7	33.47
			14.75	32.55	18.42	17.49
			11.95	27.74	16.04	18.3

## Sheet: Creatinine clearance
NOR	ADR	ADR+HU	ADR+U
3	1.75338	3.8	1.8125
4.9	1.49469	5.17491	1.80564
5.3	1.56737	3.05072	1.6683
4.3	1.29298	3.70527	3.0016
4.3	1.35542	5.49646	2.41208
5.6	1.83938	3.83731	2.09806

## Sheet: UACR
	NOR	ADR	ADR+HU	ADR+U
	0.0178793	0.672824	0.163308	0.292624
	0.0143625	0.559111	0.114359	0.501614
	0.0256091	0.415199	0.30001	0.369274
	0.0101991	0.510157	0.295617	0.26893
	0.0128938	0.400988	0.27596	0.35892
	0.015964	0.579579	0.17767	0.35567

## Sheet: TG
NOR	ADR	ADR+HU	ADR+U
0.63	11.61	4.44	4.65
0.62	10.71	2.35	5.78
0.63	10.15	3.59	5.15
0.64	12.26	1.84	6.47
0.44	13.29	4.05	10.01
0.58	10.48	2.48	6.11

## Sheet: TC
NOR	ADR	ADR+HU	ADR+U
1.5	17.11	10.29	15.04
1.64	16.22	8.94	15.41
1.49	17.72	10.04	11.42
1.62	14.9	7.07	16.57
1.22	19.23	10.79	11.05
1.57	15.2	7.86	14.35

## Sheet: SCr
			NOR	ADR	ADR+HU	ADR+U
			27.4	52.8	36.1	37.4
			26	54.6	27.7	56.7
			24.9	68.9	31.8	42.3
			26.3	69.7	26	44
			27.1	64.5	35	38.1
			26.4	52.2	36	36.7

## Sheet: LDL-C
NOR	ADR	ADR+HU	ADR+U
0.35	3.74	1.7	3.75
0.39	4.86	2.79	2.03
0.34	4.28	2.63	4.08
0.37	4.84	1.93	2.95
0.38	5.15	2.88	2.76
0.42	4.5	2.46	3.43
