# Supplementary material for: High-sulfated derivative of polysaccharide fromUlva pertusaimproves Adriamycin-induced nephrotic syndrome by suppressing oxidative stress
Source: Royal Society of Chemistry journal article supplement (doi:10.1039/d3fo01290e), 2023-01-01
Supplement: d3fo01290e2.xlsx [file d3fo01290e2.xlsx]

## Sheet: Glomerular injury
NOR	ADR	ADR+U	ADR+HU
1.2	4.2	1.8	2.8
2.2	3.1	3.8	1.6
2.1	5.1	2.8	2.1
0.3	3.2	2.2	1.5
3.3	3.3	2.7	1.6
2.1	4.1	1.2	2.4

## Sheet: Inflammation score
NOR	ADR	ADR+U	ADR+HU
0.2	3.1	2.9	2.1
1.2	2.9	1.9	2.2
1.4	3.2	1.9	1.2
0.4	3.1	2.2	2.4
0.5	2.2	3.2	1.8
0.3	3	2	1.7

## Sheet: Renal fibrosis
NOR	ADR	ADR+HU	ADR+U
0.01364	0.1265	0.09519	0.04147
0.00207	0.23163	0.06236	0.03619
0.0063	0.17438	0.0588	0.03185
0.00945	0.11373	0.07086	0.03305
0.02826	0.13939	0.05558	0.03984
0.02399	0.12176	0.07052	0.03823
