# Supplementary material for: High-sulfated derivative of polysaccharide fromUlva pertusaimproves Adriamycin-induced nephrotic syndrome by suppressing oxidative stress
Source: Royal Society of Chemistry journal article supplement (doi:10.1039/d3fo01290e), 2023-01-01
Supplement: d3fo01290e3.xlsx [file d3fo01290e3.xlsx]

## Sheet: WB-TGF β1
NOR	ADR	ADR+HU	ADR+U
0.83422	1.28597	0.473621	0.403546
0.892528	1.41894	0.455018	0.249695
0.628061	1.06451	0.650227	0.651822
0.895943	1.09811	0.564932	0.491692
0.323221	0.757376	0.663289	1.07808
0.445771	1.01806	0.936971	1.16521

## Sheet: IHC-COL-IV
NOR	0.1445	0.2297	0.1757	0.1724	0.1678	0.2274
	0.1919	0.2469	0.1493	0.2182	0.195	0.2198
	0.2583	0.337	0.1495	0.2172	0.2426	0.199
	0.1844	0.2206	0.1813	0.2367	0.2375	0.2254
	0.2346	0.2237	0.1477	0.2585	0.188	0.2154
	0.1842	0.3308	0.1281	0.2058	0.2011	0.1841
	0.2065	0.1984	0.1486	0.2302	0.2254	0.1995
	0.2494	0.2452	0.205	0.1461	0.1827	0.1829
	0.2371	0.2387	0.1794	0.1771	0.1794	0.1325
	0.2122	0.2083	0.1975	0.2143	0.1684	0.1731
	0.2275	0.2415	0.2147	0.222	0.2306	0.1404
	0.2205	0.1704	0.1984	0.2338	0.2104	0.1813
	0.2205	0.1969	0.1758	0.1575	0.1374	0.1961
	0.213	0.1434	0.1985	0.1547	0.1978	0.2633
	0.2279	0.1969	0.2389	0.1831	0.146	0.1851
	0.2406	0.1984	0.1993	0.1957	0.1406	0.2047
	0.2113	0.1754	0.2202	0.2476	0.1878	0.1651
	0.2007	0.226	0.1887	0.2126	0.2023	0.1643
	0.2508	0.2175	0.1847	0.2591	0.2104	0.1492
	0.2856	0.1798	0.2288	0.245	0.1676	0.1681
average	0.220075	0.221275	0.185505	0.20938	0.19094	0.188835
ADR	0.5028	0.4374	0.3745	0.4459	0.4485	0.3836
	0.5455	0.4741	0.3993	0.5261	0.4999	0.4027
	0.3036	0.469	0.4591	0.4397	0.3535	0.3984
	0.4716	0.5061	0.4998	0.441	0.3589	0.3923
	0.4631	0.428	0.4296	0.5127	0.333	0.3731
	0.5836	0.4917	0.4409	0.3254	0.5575	0.4218
	0.4637	0.4591	0.371	0.481	0.3658	0.3831
	0.4085	0.4882	0.3917	0.4309	0.5153	0.3723
	0.5405	0.5043	0.3533	0.3747	0.3307	0.4446
	0.4926	0.5161	0.3696	0.454	0.4613	0.4414
	0.4974	0.4335	0.3996	0.461	0.3568	0.4044
	0.429	0.5241	0.4519	0.4614	0.3563	0.3257
	0.6092	0.4881	0.4011	0.5211	0.3672	0.4163
	0.4778	0.4914	0.4206	0.5052	0.3528	0.4054
	0.5541	0.4205	0.3738	0.4665	0.3524	0.398
	0.4946	0.4459	0.3653	0.3991	0.3635	0.4555
	0.4854	0.4784	0.4122	0.4869	0.315	0.3779
	0.4973	0.494	0.5106	0.4516	0.3815	0.4159
	0.4889	0.4685	0.3988	0.4584	0.3699	0.43
	0.5297	0.5581	0.4966	0.4079	0.3746	0.41
average	0.491945	0.478825	0.415965	0.452525	0.39072	0.40262
ADR+U	0.3009	0.2864	0.3039	0.3727	0.2972	0.2965
	0.3542	0.3292	0.2898	0.3505	0.4475	0.4246
	0.3374	0.3886	0.3313	0.4181	0.3456	0.3451
	0.2715	0.3606	0.3567	0.3501	0.3732	0.3866
	0.2568	0.279	0.401	0.3367	0.3309	0.3303
	0.282	0.2755	0.268	0.3331	0.332	0.3699
	0.2448	0.3563	0.2929	0.3613	0.3415	0.2666
	0.3177	0.279	0.2941	0.4002	0.2575	0.343
	0.3492	0.3155	0.2683	0.357	0.3561	0.3115
	0.2773	0.4183	0.3016	0.2841	0.3145	0.3997
	0.3058	0.3571	0.2756	0.3993	0.2897	0.3803
	0.3291	0.4204	0.4169	0.3696	0.2653	0.4084
	0.3507	0.342	0.3154	0.3074	0.2636	0.3657
	0.2563	0.2582	0.3014	0.341	0.2603	0.2991
	0.2965	0.2492	0.3327	0.2856	0.2766	0.3789
	0.3304	0.2466	0.3489	0.3999	0.2445	0.3998
	0.3052	0.3009	0.3585	0.3484	0.2605	0.3186
	0.436	0.3886	0.3943	0.3542	0.3367	0.3404
	0.3433	0.3506	0.288	0.3661	0.3062	0.261
	0.3153	0.4326	0.4102	0.3608	0.2918	0.3923
average	0.31302	0.33173	0.327475	0.354805	0.30956	0.350915
ADR+HU	0.3397	0.305	0.2368	0.326	0.2963	0.1551
	0.2575	0.2478	0.2374	0.3369	0.4593	0.2604
	0.2467	0.2922	0.2321	0.3718	0.5171	0.1801
	0.2265	0.3596	0.2408	0.275	0.4057	0.1616
	0.2906	0.2412	0.2257	0.3341	0.3447	0.2877
	0.3262	0.3119	0.2737	0.3077	0.2535	0.3418
	0.3078	0.2403	0.2586	0.2664	0.2802	0.3269
	0.2226	0.3746	0.3363	0.2918	0.3441	0.2998
	0.2334	0.304	0.2938	0.1842	0.281	0.3118
	0.2226	0.2622	0.3421	0.2594	0.3287	0.3643
	0.2186	0.3557	0.308	0.2064	0.3009	0.2575
	0.2128	0.2585	0.2487	0.2356	0.2985	0.2695
	0.3092	0.2645	0.3544	0.2354	0.304	0.2755
	0.2365	0.2721	0.3612	0.1886	0.3016	0.241
	0.2135	0.2111	0.3986	0.2626	0.3562	0.3075
	0.2366	0.3796	0.3097	0.3494	0.2444	0.1705
	0.204	0.2031	0.2889	0.2921	0.3359	0.1928
	0.2638	0.2986	0.2543	0.2826	0.2772	0.223
	0.2996	0.3179	0.293	0.1975	0.3459	0.2601
	0.3156	0.2591	0.2325	0.249	0.2747	0.3199
average	0.25919	0.28795	0.28633	0.272625	0.327495	0.26034

## Sheet: IHC-COL-I
NOR	0.0003	0.0051	0.0191	0.0098	0.0142	0.0042
	0.0015	0.0036	0.0126	0.0043	0.0121	0.0011
	0.0017	0.0028	0.0066	0.0099	0.0157	0.0106
	0.008	0.0094	0.0102	0.0112	0.0165	0.0074
	0.0061	0.005	0.0073	0.0099	0.0137	0.0042
	0.0077	0.0114	0.0083	0.0055	0.0123	0.0028
	0.008	0.0106	0.007	0.0071	0.0029	0.0032
	0.0034	0.0063	0.0079	0.0122	0.0114	0.002
	0.0022	0.009	0.0117	0.0103	0.0037	0.0009
	0.005	0.0137	0.0074	0.0094	0.0055	0.0032
average	0.00439	0.00769	0.00981	0.00896	0.0108	0.00396
ADR	0.2694	0.2107	0.1762	0.1921	0.1674	0.2307
	0.368	0.2264	0.1863	0.1796	0.2046	0.2443
	0.2	0.2291	0.1988	0.2306	0.3419	0.1904
	0.2051	0.1471	0.1887	0.2088	0.1734	0.1969
	0.2528	0.2263	0.2338	0.2205	0.1156	0.1701
	0.2607	0.2199	0.2423	0.235	0.211	0.1727
	0.2334	0.2815	0.237	0.1956	0.2021	0.2118
	0.198	0.2747	0.1883	0.2201	0.1695	0.1899
	0.3591	0.2092	0.1949	0.2285	0.1787	0.2142
	0.3128	0.1956	0.1792	0.2302	0.1801	0.2399
average	0.26593	0.22205	0.20255	0.2141	0.19443	0.20609
ADR+U	0.1705	0.1832	0.13	0.2136	0.1649	0.1874
	0.1971	0.1745	0.1993	0.1699	0.1986	0.1453
	0.1708	0.2335	0.1892	0.1767	0.2259	0.1642
	0.1415	0.1805	0.1777	0.1897	0.1231	0.1832
	0.1841	0.2177	0.1809	0.175	0.1253	0.1756
	0.1757	0.1827	0.2123	0.1885	0.1615	0.168
	0.1564	0.1775	0.1879	0.1874	0.1787	0.114
	0.1571	0.2369	0.1217	0.2535	0.1778	0.1624
	0.1731	0.2041	0.1806	0.155	0.1728	0.1647
	0.1594	0.1456	0.1885	0.1594	0.1929	0.1831
average	0.16857	0.19362	0.17681	0.18687	0.17215	0.16479
ADR+HU	0.1456	0.1217	0.1358	0.1409	0.1903	0.1357
	0.1583	0.1414	0.1452	0.1438	0.1837	0.1278
	0.1351	0.1347	0.1999	0.153	0.1383	0.1454
	0.1611	0.124	0.1429	0.1199	0.1325	0.1354
	0.1351	0.1861	0.1642	0.1173	0.1756	0.0778
	0.1372	0.169	0.1431	0.1991	0.1321	0.079
	0.145	0.1313	0.156	0.1527	0.1344	0.1521
	0.1412	0.1434	0.1706	0.1247	0.149	0.147
	0.1244	0.1266	0.1109	0.1501	0.0905	0.1386
	0.1114	0.1341	0.1199	0.1888	0.0972	0.1641
average	0.13944	0.14123	0.14885	0.14903	0.14236	0.13029

## Sheet: qPCR-COL-I
NOR	COL-I	25.2402	25.5478	17.5285	29.131	27.2882	17.9029
		25.3016	25.6148	17.7359	28.9624	26.0344	17.7815
		25.0156	25.3865	17.9603	29.0009	27.3319	17.8058
	B-actin	28.233	29.1207	23.4678	29.5697	32.9476	23.7904
	COL-I/B-actin	0.892069	0.876229	0.755996	0.981798	0.815987	0.749464
ADR	COL-I	23.8322	23.8114	27.5228	27.9781	27.4544	27.9096
		24.2396	23.5881	27.6957	27.9829	27.0532	27.9112
		23.0998	23.0558	27.5522	27.9851	27.5683	27.7957
	B-actin	19.1764	19.3791	22.628	23.384	22.6389	22.3732
	COL-I/B-actin	1.23714	1.21188	1.21929	1.19663	1.20848	1.24578
ADR+U	COL-I	23.921	23.3799	27.5882	26.4113	26.6228	27.2447
		23.9434	24.0375	27.6145	26.3704	27.385	27.4031
		23.8304	23.8393	27.5817	26.4287	27.1173	26.9868
	B-actin	19.9153	19.8807	23.2698	22.4735	22.4808	23.5892
	COL-I/B-actin	1.19999	1.19474	1.18587	1.17487	1.20288	1.15356
ADR+HU	COL-I	24.6095	24.7112	24.6259	24.4543	25.3673	25.0834
		23.4705	23.212	23.5715	25.032	25.1654	25.2416
		24.9386	23.0913	24.4903	24.9657	24.7844	23.3699
	B-actin	23.6827	23.5914	22.6913	22.9869	22.7405	24.1872
	COL-I/B-actin	1.02774	1.0034	1.06778	1.07963	1.10401	1.01562

## Sheet: qPCR-COL-IV
NOR	COL-IV	23.6686	25.4161	22.5323	21.0335	25.5512	26.112
		24.7962	24.5022	22.4839	21.7998	25.9796	25.9959
		23.4632	25.2875	22.4779	21.9675	25.8744	26.071
	B-actin	27.4979	29.1921	23.9687	23.6746	28.533	30.4585
	COL-IV/B-actin	0.87192	0.858745	0.938643	0.912383	0.904276	0.855577
ADR	COL-IV	23.9842	25.5245	26.1205	25.7767	25.6793	25.8766
		24.1349	25.3714	26.1694	25.9999	25.2517	25.6865
		24.0639	25.5735	26.0675	26.2107	24.1972	25.6522
	B-actin	22.2288	22.6201	22.5981	23.4162	22.6422	22.3294
	COL-IV/B-actin	1.08243	1.12687	1.15581	1.11016	1.10602	1.15267
ADR+U	COL-IV	23.9635	24.0858	23.9684	23.8743	21.754	23.4359
		24.0136	24.0743	23.9623	23.8978	21.9254	23.3714
		23.9676	24.0423	24.0432	23.9588	21.8096	23.2522
	B-actin	22.7647	23.2892	22.447	23.4381	21.4671	22.595
	COL-IV/B-actin	1.05346	1.03342	1.0688	1.02015	1.01689	1.03355
ADR+HU	COL-IV	23.8643	23.6208	23.1672	21.9362	21.7527	22.6245
		23.6779	22.8626	22.9836	21.8223	21.8682	22.6013
		23.6177	23.3311	22.7922	21.7672	21.7921	22.4884
	B-actin	23.645	23.1334	23.9785	22.5486	22.2922	23.4999
	COL-IV/B-actin	1.00317	1.00597	0.9584	0.96866	0.978115	0.960488
