# Supplementary material for: High-sulfated derivative of polysaccharide fromUlva pertusaimproves Adriamycin-induced nephrotic syndrome by suppressing oxidative stress
Source: Royal Society of Chemistry journal article supplement (doi:10.1039/d3fo01290e), 2023-01-01
Supplement: d3fo01290e5.xlsx [file d3fo01290e5.xlsx]

## Sheet: kidney CAT
				CAT ACTIVITY
NOR	0.609133	0.0658	4.45516	4.78982
	0.597267	0.0650667	4.47016	4.67593
	0.5899	0.0646667	4.46972	4.61517
	0.5859	0.0631	4.32533	4.74715
	0.5949	0.0627333	4.41959	4.72914
	0.594233	0.0628	4.48374	4.65505
ADR	0.602733	0.4028	4.13287	1.89998
	0.652567	0.250267	4.13287	3.82309
	0.661433	0.474567	4.0119	1.82935
	0.595033	0.2844	4.0119	3.04098
	0.5957	0.2982	4.04715	2.88705
	0.6537	0.418033	4.04715	2.28699
ADR+U	0.619667	0.387633	4.18257	2.17883
	0.658967	0.4682	4.18257	1.79133
	0.627533	0.221467	4.20392	3.79367
	0.6454	0.289967	4.30398	3.24343
	0.653433	0.338633	4.18192	2.95649
	0.6225	0.249367	4.18192	3.50433
ADR+HU	0.605967	0.119333	4.06073	4.70668
	0.616033	0.194333	4.02745	4.11235
	0.624267	0.138733	4.04671	4.7123
	0.605833	0.106833	4.24377	4.61812
	0.634367	0.202567	4.24377	3.9962
	0.6196	0.0642333	4.45571	4.8953

## Sheet: serum CAT
			CAT ACTIVITY
NOR	0.684167	0.4924	7.53164
	0.663267	0.420667	9.52811
	0.6842	0.448067	9.27414
	0.667533	0.432533	9.22963
	0.6789	0.4387	9.43385
	0.673767	0.461233	8.34725
ADR	0.790567	0.738233	2.05539
	0.820667	0.752633	2.67201
	0.823467	0.765933	2.25962
	0.870733	0.798667	2.83042
	0.786867	0.729033	2.2714
	0.623733	0.5547	2.71128
ADR+U	0.6135	0.568467	1.76868
	0.689967	0.554933	5.30343
	0.657533	0.624667	1.29084
	0.7723	0.6545	4.6266
	0.647433	0.541467	4.16184
	0.9731	0.885967	3.42216
ADR+HU	0.6315	0.519533	4.39749
	0.620767	0.488367	5.20001
	0.6558	0.5556	3.93536
	0.618967	0.527767	3.58188
	0.646133	0.460167	7.30384
	0.629067	0.443667	7.28159

## Sheet: kidney GSH-Px
						GSH-Px activity
NOR	0.177733	0.377933	0.0913	0.1809	0.5529	404.119
	0.180967	0.375833	0.0913	0.1809	0.548619	396.423
	0.204567	0.373167	0.0913	0.1809	0.541966	347.199
	0.1618	0.4083	0.0867	0.159467	0.546552	619.802
	0.158467	0.3566	0.0867	0.159467	0.546608	498.137
	0.159433	0.360667	0.0867	0.159467	0.550763	502.114
	0.192667	0.356967	0.0867	0.159467	0.546347	413.273
	0.1693	0.3445	0.0867	0.159467	0.548358	439.073
	0.155367	0.359167	0.0867	0.159467	0.548334	510.771
ADR	0.169967	0.355833	0.0867	0.159467	0.543152	470.27
	0.199633	0.373033	0.0913	0.1809	0.534574	362.021
	0.1783	0.3849	0.0913	0.1809	0.536944	429.431
	0.1907	0.3705	0.0913	0.1809	0.538684	372.518
	0.167833	0.3678	0.0913	0.1809	0.539832	413.419
	0.1672	0.345733	0.0913	0.1809	0.536481	371.413
	0.205567	0.359167	0.0913	0.1809	0.543845	315.216
	0.158467	0.354067	0.0913	0.1809	0.541426	403.201
	0.1899	0.362633	0.0913	0.1809	0.539784	357.148
U	0.186433	0.3759	0.0859	0.179667	0.545414	370.474
	0.1838	0.380833	0.0859	0.179667	0.541012	388.405
	0.195333	0.377733	0.0859	0.179667	0.533467	364.644
	0.210867	0.3822	0.0876333	0.1811	0.541461	338.546
	0.187067	0.379267	0.0876333	0.1811	0.54468	377.533
	0.2146	0.381267	0.0876333	0.1811	0.538941	330.865
	0.2024	0.3797	0.0876333	0.1811	0.549963	344.92
	0.189567	0.379867	0.0876333	0.1811	0.544269	374.083
	0.2166	0.382033	0.0876333	0.1811	0.539825	327.879
HU	0.190167	0.381133	0.0876333	0.1811	0.538092	379.703
	0.178133	0.385433	0.0876333	0.1811	0.539832	410.85
	0.200033	0.387567	0.0876333	0.1811	0.536196	374.195
	0.199367	0.380233	0.0876333	0.1811	0.53433	362.153
	0.2094	0.384767	0.0876333	0.1811	0.543013	345.525
	0.204333	0.383933	0.0876333	0.1811	0.546229	351.783
	0.212533	0.384333	0.0876333	0.1811	0.542028	339.113
	0.202667	0.387	0.0876333	0.1811	0.542561	363.495
	0.179733	0.383633	0.0876333	0.1811	0.542481	402.139

## Sheet: Serum GSH-Px
					GSH-Px activity
NOR	0.3639	0.104867	0.0884333	0.176333	1768.15
	0.358833	0.103167	0.0884333	0.176333	1745.16
	0.360567	0.106	0.0884333	0.176333	1737.66
	0.364067	0.1098	0.0884333	0.176333	1735.61
	0.363367	0.104033	0.0884333	0.176333	1770.19
	0.357433	0.103033	0.0884333	0.176333	1736.52
ADR	0.3697	0.1201	0.0884333	0.176333	1419.8
	0.368167	0.1256	0.0884333	0.176333	1379.79
	0.371333	0.1592	0.0884333	0.176333	1206.67
	0.370633	0.1328	0.0884333	0.176333	1352.86
	0.3666	0.119567	0.0884333	0.176333	1405.2
	0.372367	0.149233	0.0884333	0.176333	1269.25
ADR+U	0.374867	0.130867	0.0855333	0.175233	1632.11
	0.385	0.204067	0.0855333	0.175233	1210.26
	0.377333	0.150267	0.0855333	0.175233	1518.84
	0.372667	0.118767	0.0855333	0.175233	1698.33
	0.3776	0.142667	0.0855333	0.175233	1571.46
	0.3685	0.145033	0.0850333	0.174233	1503.14
ADR+HU	0.375167	0.1145	0.0855333	0.175233	1743.59
	0.381867	0.1369	0.0855333	0.175233	1638.57
	0.378367	0.1223	0.0855333	0.175233	1712.82
	0.374533	0.117533	0.0855333	0.175233	1719.06
	0.375167	0.111067	0.0855333	0.175233	1766.56
	0.377433	0.131433	0.0855333	0.175233	1645.48

## Sheet: Serum MDA
NOR	ADR	ADR+HU	ADR+U
5.78	19.03	10.83	17.65
4.11	18.75	19.28	16.09
2.07	23.04	9.84	15.22
2.55	17.68	14.98	18.38
3.11	19.67	11.02	15.72
9.21	17.48	10.86	17.09

## Sheet: Kindey MDA
NOR	ADR	ADR+HU	ADR+U
47.74	84.32	41.55	63.97
50.3	75.88	64.16	97.38
43.05	72.2	55.33	96.09
40.45	77.53	56.11	59.36
39.41	84.36	51.34	69.2
57.41	76.91	66.76	63.27

## Sheet: kidney SOD
							SOD ACTIVITY
NOR	0.1326	0.1324	0.1283	0.1311	0.306481	0.2959	123.571
	0.1365	0.1335	0.1299	0.1333	0.306481	0.2959	121.922
	0.1251	0.1245	0.1228	0.124133	0.306481	0.2959	128.795
	0.1147	0.1139	0.1131	0.1139	0.306481	0.2959	136.468
	0.1387	0.1391	0.1392	0.139	0.340047	0.405833	131.481
	0.1458	0.141	0.1418	0.142867	0.360074	0.405833	122.368
ADR	0.1895	0.188	0.1869	0.188133	0.343332	0.2959	72.133
	0.1554	0.1508	0.1487	0.151633	0.343332	0.2959	96.564
	0.1252	0.1223	0.1197	0.1224	0.343332	0.2959	116.131
	0.1377	0.1369	0.1351	0.136567	0.343332	0.2959	106.649
	0.1238	0.1223	0.1208	0.1223	0.343332	0.2959	116.198
	0.1913	0.1894	0.1829	0.187867	0.32584	0.405833	112.085
ADR+U	0.1495	0.1502	0.1482	0.1493	0.32108	0.2959	104.926
	0.1186	0.1178	0.1161	0.1175	0.32108	0.2959	127.687
	0.1559	0.1563	0.1554	0.155867	0.32108	0.2959	100.226
	0.1321	0.1319	0.1289	0.130967	0.32108	0.2959	118.048
	0.1227	0.1207	0.1206	0.121333	0.32108	0.2959	124.943
	0.1319	0.1314	0.1336	0.1323	0.395489	0.405833	115.888
ADR+HU	0.117	0.1157	0.1145	0.115733	0.307375	0.2959	134.701
	0.1384	0.1391	0.1361	0.137867	0.307375	0.2959	118.153
	0.127	0.1249	0.1254	0.125767	0.307375	0.2959	127.199
	0.1254	0.1243	0.1217	0.1238	0.307375	0.2959	128.67
	0.1302	0.1301	0.1288	0.1297	0.307375	0.2959	124.259
	0.1388	0.1433	0.1428	0.141633	0.356601	0.405833	124.14

## Sheet: serum SOD
			SOD ACTIVITY
NOR	0.321933	0.0821	798.617
	0.3124	0.0856	778.264
	0.3141	0.0824333	790.661
	0.321233	0.0846	789.678
	0.3138	0.0826667	789.595
	0.3133	0.081	794.847
ADR	0.3234	0.201967	402.525
	0.331533	0.220633	358.591
	0.302433	0.2073	337.208
	0.3073	0.2136	326.868
	0.3088	0.2188	312.435
	0.3094	0.212633	335.274
ADR+U	0.325467	0.203367	402.165
	0.339767	0.217133	386.921
	0.328333	0.214533	371.554
	0.320467	0.1807	467.537
	0.324467	0.178867	481.045
	0.331733	0.212733	384.55
HU	0.346167	0.1982	458.219
	0.341767	0.180467	505.941
	0.3383	0.197167	447.221
	0.329267	0.200533	419.12
	0.325633	0.199467	415.347
	0.3382	0.213133	396.427
