# Supplementary material for: High-sulfated derivative of polysaccharide fromUlva pertusaimproves Adriamycin-induced nephrotic syndrome by suppressing oxidative stress
Source: Royal Society of Chemistry journal article supplement (doi:10.1039/d3fo01290e), 2023-01-01
Supplement: d3fo01290e6.xlsx [file d3fo01290e6.xlsx]

## Sheet: WB-Keap1
NOR	ADR	ADR+HU	ADR+U
0.297141	1.20351	0.753558	0.868679
0.717412	0.963964	0.725251	0.966077
0.694231	0.981749	0.931741	0.706054
1.06886	1.24514	0.811181	0.7553
1.19894	1.23662	0.883919	0.922499
0.754714	1.21103	0.819733	0.873261

## Sheet: WB-Nrf2
NOR	ADR	ADR+HU	ADR+U
0.996362	0.159149	1.10624	0.773308
0.968786	0.188201	1.11018	0.699172
0.646192	0.526912	1.12094	0.925912
1.12176	0.656107	1.10283	0.89988
1.29258	0.38378	1.10229	0.953637
1.33003	0.286245	1.22697	0.800096

## Sheet: WB-p-Nrf2
NOR	ADR	ADR+HU	ADR+U
0.906956	0.307505	0.587924	0.910753
0.615052	0.413794	0.814919	0.926418
0.501753	0.430461	0.739046	0.783274
0.511605	0.570557	0.750067	0.871698
0.979043	0.397518	0.584972	0.46099
0.66599	0.349455	0.610501	0.458282

## Sheet: qPCR-Keap1
NOR	ADR	ADR+HU	ADR+U
1.315	1.396	1.343	1.423
1.325	1.405	1.355	1.383
1.289	1.455	1.353	1.385
1.366	1.413	1.347	1.379
1.316	1.416	1.337	1.393
1.322	1.42	1.354	1.377

## Sheet: qPCR-Nrf2
NOR	ADR	ADR+HU	ADR+U
1.192	1.125	1.169	1.157
1.206	1.119	1.173	1.157
1.266	1.112	1.181	1.149
1.193	1.128	1.203	1.148
1.218	1.104	1.172	1.157
1.197	1.126	1.181	1.153
